# Supplementary material
Source: PubMed Central journal article supplement (PMC5369675)
Supplement: PEDS_20163056SupplementaryData.pdf [file PEDS_20163056SupplementaryData.pdf]

## Supplemental Information

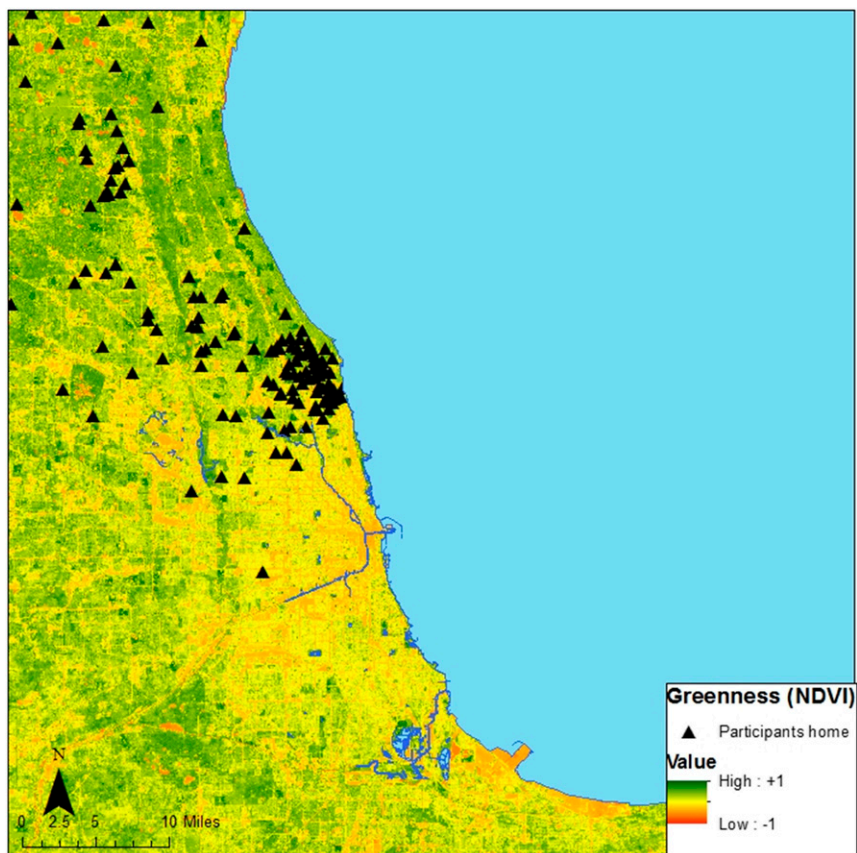

**SUPPLEMENTAL FIGURE 3**  
Neighborhood Greenness Map of the Chicago Region
